# Supplementary material for: A Multicenter Preclinical MRI Study: Definition of Rat Brain Relaxometry Reference Maps
Source: PubMed Central journal article supplement (PMC7248563; doi:10.3389/fninf.2020.00022), 2020-05-19
Supplement: Presentation_1.pdf [file Presentation_1.pdf]

## Supplementary Material

**Table 1: Animal information**

| Acq month   | center | Rat_id | Weight (g)        | Age (weeks) | Breath rate (bpm) | Temperature (°C) |
|-------------|--------|--------|-------------------|-------------|-------------------|------------------|
| December    | GIN    | S1     | 274               | 7           |                   |                  |
| December    | GIN    | S2     | 258               | 7           |                   |                  |
| December    | GIN    | S3     | 286               | 7           |                   |                  |
| December    | GIN    | S4     | 264               | 7           |                   |                  |
| December    | GIN    | S5     | 300               | 7           |                   |                  |
| December    | GIN    | S6     | 294               | 7           | 70-82             |                  |
| December    | GIN    | S7     | 304               | 7           | 75-97             |                  |
| December    | GIN    | S8     | 304               | 7           | 82                |                  |
| December    | GIN    | S9     | 288               | 7           | 70-80             |                  |
| December    | GIN    | S10    | 296               | 7           | 75-97             |                  |
| December    | CRMBM  | S11    | 249,5             | 7           | 60                |                  |
| December    | CRMBM  | S12    | 263,6             | 7           | 80-88             | 36,8             |
| December    | CRMBM  | S13    | 267               | 7           | 30                | 34               |
| December    | CRMBM  | S14    | 269               | 7           | 75                | 37,2             |
| December    | CRMBM  | S15    | 273               | 7           | 65-75             | 37               |
| December    | CRMBM  | S16    | 279,9             | 7           | 90                | 37,5             |
| December    | CRMBM  | S17    | 277               | 7           | 80                | 37,7             |
| December    | CRMBM  | S18    | 277               | 7           | 75-80             | 35,6             |
| December    | CRMBM  | S19    | 271,3             | 7           | 65                | 34,6             |
| December    | CRMBM  | S20    | 274               | 7           | 70                | 35,9             |
| May         | GIN    | S21    | 294               | 10          | 70                | 37,7             |
| May         | GIN    | S22    | 256               | 10          | 70-75             | 37,8             |
| May         | GIN    | S23    | 278               | 10          | 70                | 38,5             |
| May         | GIN    | S24    | 282               | 10          | 70                | 37,9             |
| May         | GIN    | S25    | 268               | 10          | 65                | 36,8             |
| May         | GIN    | S26    | 274               | 10          | 70                | 37,7             |
| May         | GIN    | S27    | 314               | 10          | 70                | 37,5             |
| May         | GIN    | S28    |                   | 10          | 75                | 37,1             |
| May         | GIN    | S29    | 262               | 10          | 60                | 36,8             |
| May         | GIN    | S30    | 274               | 10          | 65                | 37               |
| May         | CRMBM  | S31    | 297,5             | 7           | 60                | 34,8             |
| May         | CRMBM  | S32    | 284,9             | 7           | 60                | 34,8             |
| May         | CRMBM  | S33    | 302,7             | 7           | 55-55             | 35,3             |
| May         | CRMBM  | S34    | 284,8             | 7           | 55-60             | 35,1             |
| May         | CRMBM  | S35    | 290,5             | 7           | 70-60             | 35               |
| May         | CRMBM  | S36    | 284,3             | 7           | 65                | 34,4             |
| May         | CRMBM  | S37    | 275,7             | 7           | 60                | 34,5             |
| May         | CRMBM  | S38    | 286,9             | 7           | 120-60            | 34,8             |
| May         | CRMBM  | S39    | 285,5             | 7           | 120-60            | 36,2             |
| May         | CRMBM  | S40    | 290               | 7           | 65                | 34,3             |
| <b>Mean</b> |        |        | 279.40 (SD=13.87) |             | 67.13 (SD=11.42)  | 36.21 (SD=1.36)  |

## Data

### Inter subject variability

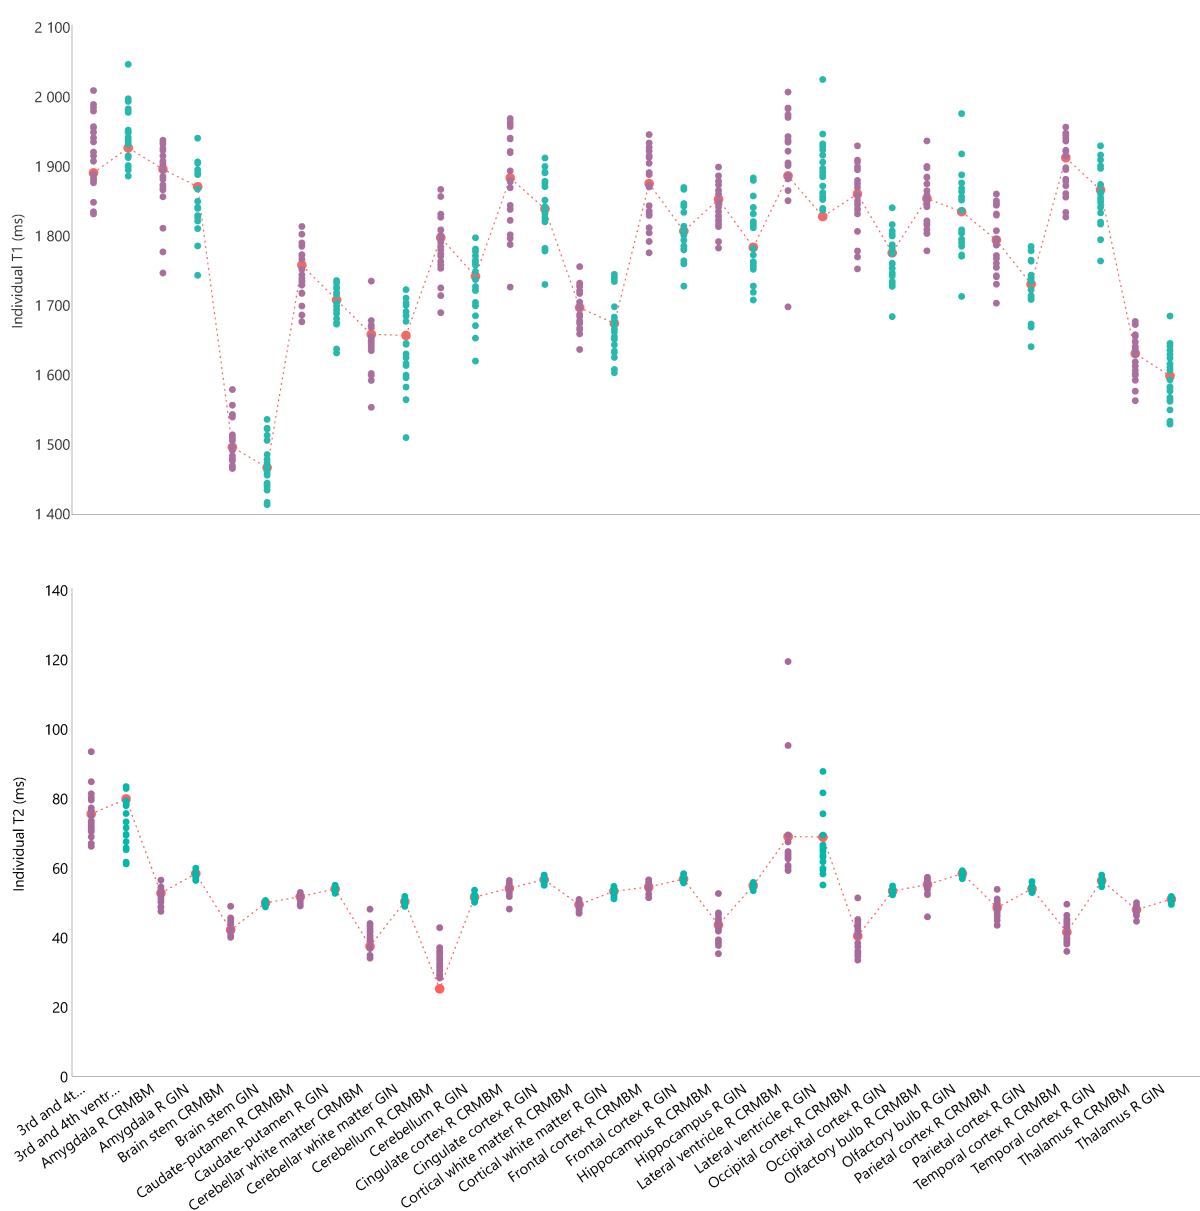

**Figure S1: Individual relaxation time values for 13 regions of interest for the left hemisphere. Top:** Individual T1 values. **Bottom:** Individual T2 values. Green circles for aC1 values; purple circles for aC2 values and corresponding mean values indicated with a red mark and dash-line. fC2 fitting pipeline and sC3 multi-atlas segmentation were used.

## Inter-center variability

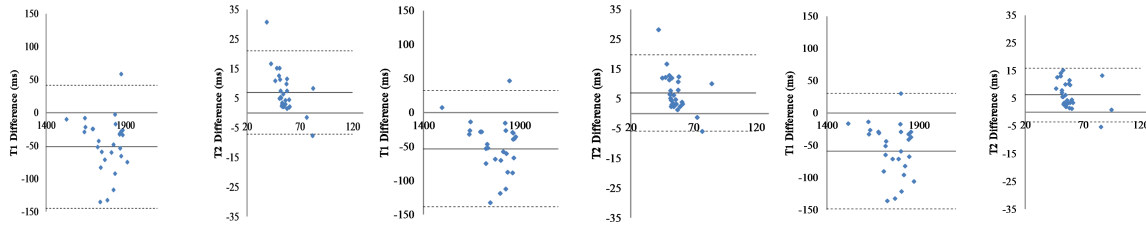

**Figure S2: Inter-center variability.** Differences between T1 (left) and T2 (right) relaxation times computed from data acquired at aC1 (n=20) and aC2 (n=20) for the 29 regions of interest. Fitting pipeline fC1 and Segmentation sC4 (left). Fitting pipeline fC2 and Segmentation sC3 (middle) Fitting pipeline fC3 and Segmentation sC4 (right). Solid line: mean difference. Dash lines:  $\pm 2$  standard deviation. X-axis in ms.

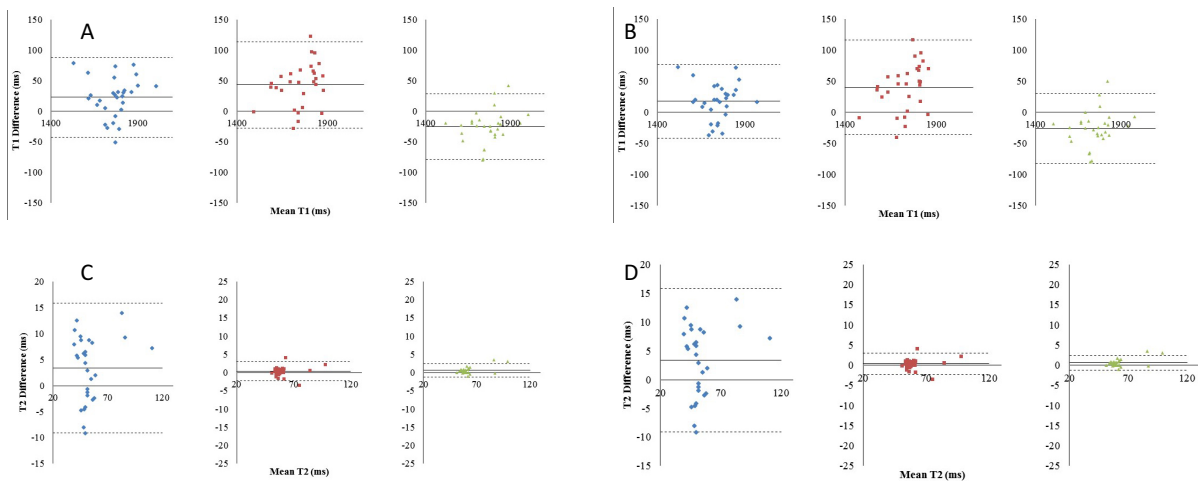

**Figure S3. Intra-center reproducibility.** Top T1 acquisition: Bland-Altman graph showing the differences in T1 relaxation time (mean values for each ROI) between the two acquisitions versus the corresponding mean T1 value using two processing pipelines. A) Left: S32 (aC2). Middle: S21 (aC1). Right: S22 (aC1). Fitting pipeline fC1, Segmentation sC4. B) Left: S32 (C2). Middle S21 (C1). Right S22 (C1).. Fitting pipeline fC3, Segmentation sC3.

Bottom T2 acquisition: Bland-Altman graph showing the differences in T2 relaxation time (mean values for each ROI) between the two acquisitions versus the corresponding mean T2 value. C) Left: S32 (aC2). Middle: S21 (aC1). Right: S22 (aC1). Fitting pipeline fC1, Segmentation sC4. D) Left: S32 (C2). Middle S21 (C1). Right S22 (C1). Fitting pipeline fC3, Segmentation sC3.

Solid line: mean value, dash lines  $\pm 2$  standard deviations.

## Pipelines comparison

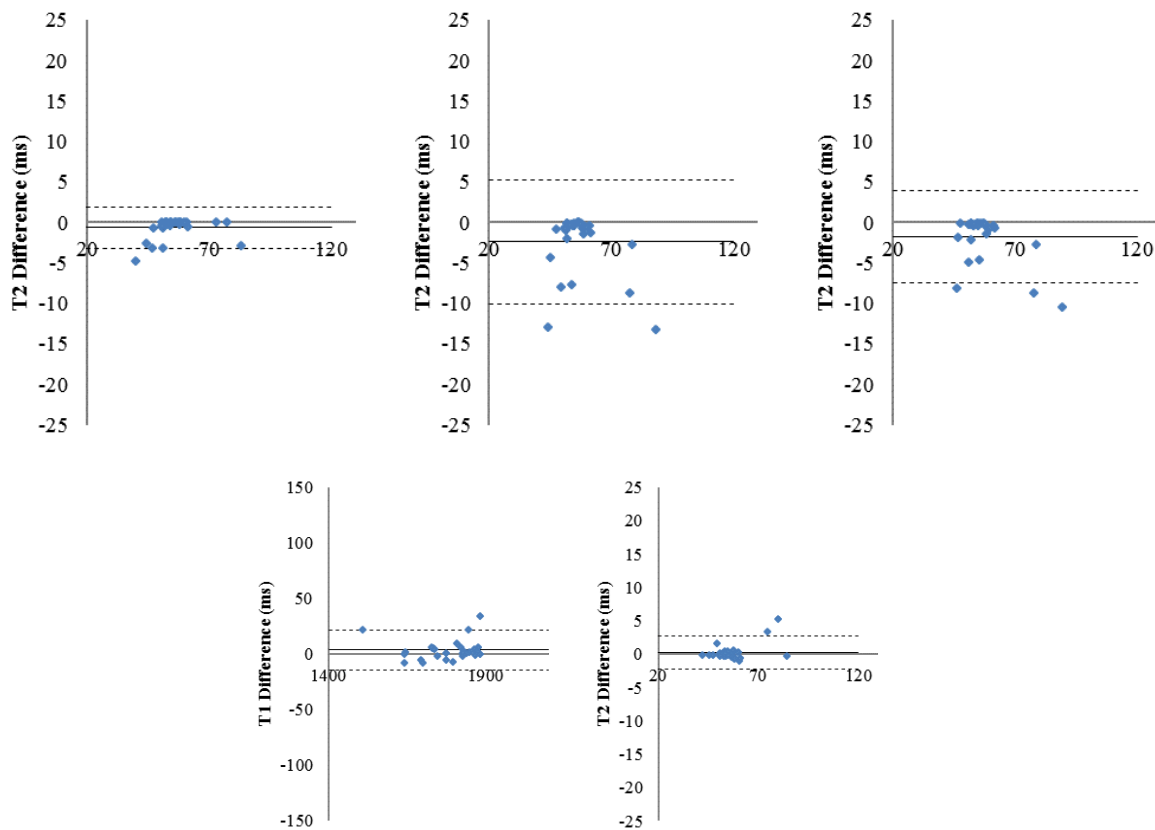

**Figure S4: Comparison pipelines. Top: Fitting pipelines.** T2 relaxation times values differences computed using different fitting pipelines for all regions of interest ( $n=29$ ) and average out over the whole set of animals ( $n=40$ ). Left: T2 values differences for fC1 minus fC2; Middle: T2 values differences for fC1 minus fC3; Right: T2 values differences for fC2 minus fC3. sC4 for segmentation. Solid line: Mean difference. Dash lines:  $\pm 2$  standard deviations. **Bottom: Segmentation pipelines.** T1 (left) and T2 (right) relaxation times value differences measured for all regions of interest and average out of the whole set of animals ( $n=40$ ) using the two different segmentation pipelines sC3 and sC4. fC2 fitting pipeline. Solid line: mean difference. Dash line:  $\pm 2$  standard deviations.

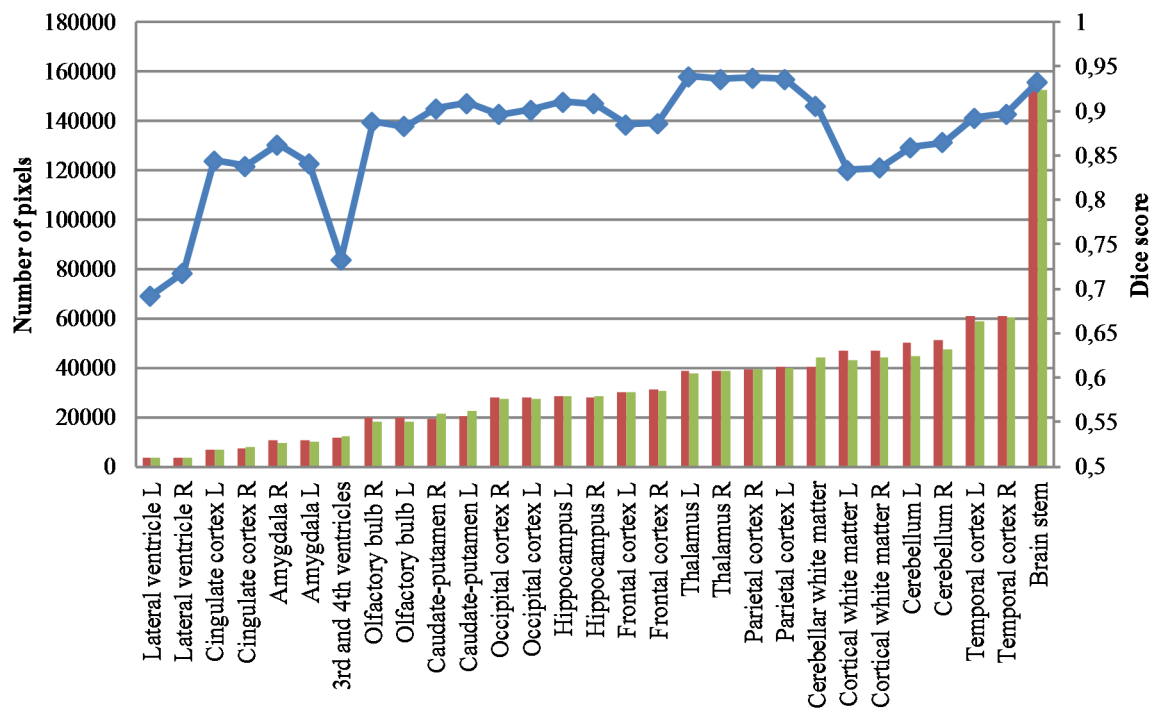

**Figure S5: Differences between sC3 (Mircen) and sC4 (ICube) multi-atlas segmentation.**

Dice score (blue) and number of voxels using sC3 (green) or sC4 (red) in the different regions.
